# Supplementary material
Source: publisher site journal article supplement (https://www.dovepress.com/article/552365)
Supplement: Supplementary file 1 [file 552365%20Supplementary%20Material.docx]

**Table S1. Baseline clinical characteristics in PWLH with and without MetS**

|  | Overall (n=848) | MetS group (n=266) | Non-MetS group (n=582) | P Value |
| --- | --- | --- | --- | --- |
| Sex (n, %) |  |  |  | 0.003 |
| Male | 735 (86.7) | 244 (91.7) | 491 (84.4) |  |
| Female | 113 (13.3) | 22 (8.3) | 91 (15.6) |  |
| Age (years) | 36 (29,46) | 39 (32,49) | 34 (28,43) | <0.001 |
| HIV Transmission Risk (n, %) |  |  |  | <0.001 |
| MSM | 426 (50.2) | 155 (58.3) | 271 (46.6) |  |
| Heterosexual | 359 (42.3) | 102 (38.3) | 257 (44.2) |  |
| Other/unknown | 63 (7.4) | 9 (3.4) | 54 (9.3) |  |
| Abdominal obesity (n, %) |  |  |  | 0.080 |
| Yes | 10 (1.2) | 6 (2.3) | 4 (0.7) |  |
| No | 838 (98.8) | 260 (97.7) | 578 (99.3) |  |
| Hyperglycemia (n, %) |  |  |  | 0.430 |
| Yes | 17 (2.0) | 7 (2.6) | 10 (1.7) |  |
| No | 831 (98.0) | 259 (97.4) | 572 (98.3) |  |
| Hypertension (n, %) |  |  |  | <0.001 |
| Yes | 41 (4.8) | 25 (9.4) | 16 (2.7) |  |
| No | 807 (95.2) | 241 (90.6) | 566 (97.3) |  |
| Elevated TG (n, %) |  |  |  | 0.081 |
| Yes | 25 (2.9) | 12 (4.5) | 13 (2.2) |  |
| No | 823 (97.1) | 254 (95.5) | 569 (97.8) |  |
| Reduced HDL (n, %) |  |  |  | 0.091 |
| Yes | 121 (14.3) | 46 (17.3) | 75 (12.9) |  |
| No | 727 (85.7) | 220 (82.7) | 507 (87.1) |  |
| Baseline CD4 count (cells/μL) | 407.0 (279.0,531.8) | 421.5 (289.3,541.3) | 396.5 (277.0,530.0) | 0.212 |
| Baseline CD8 count (cells/μL) | 647.5 (480.3,921.0) | 720.5 (483.3,975.3) | 633.0 (479.5,874.0) | 0.043 |
| Baseline HIV viral load (n, %) |  |  |  | 0.089 |
| ﻿ Viral suppression | 688(81.1) | 206 (77.4) | 482 (82.8) |  |
| Low HIV viral load | 115(13.6) | 40 (15.0) | 75 (12.9) |  |
| High HIV viral load | 45(5.3) | 20 (7.5) | 25 (4.3) |  |
| ART regimen (n, %) |  |  |  | 0.106 |
| NNRTIs+NRTIs | 653 (77.0) | 217 (81.6) | 436 (74.9) |  |
| PIs+NRTIs | 52 (6.1) | 13 (4.9) | 39 (6.7) |  |
| INSTIs+NRTIs | 143 (16.9) | 36 (13.5) | 107 (18.4) |  |
| TDF use (n, %) |  |  |  | 0.580 |
| non-TDF-based | 574 (67.7) | 184 (69.2) | 390 (67.0) |  |
| TDF-based | 274 (32.3) | 82 (30.8) | 192 (33.0) |  |
| Follow up time (days) | 1415 (677,1705) | 1244 (524,1640) | 1479 (784,1715) | <0.001 |
| Viremia Category (n, %) |  |  |  | 0.037 |
| No LLV | 667 (78.7) | 195 (73.3) | 472 (81.1) |  |
| LLV 51-200 | 125 (14.7) | 49 (18.4) | 76 (13.1) |  |
| LLV 201-500 | 56 (6.6) | 22 (8.3) | 34 (5.8) |  |

**Abbreviations**: PLWH, people living with HIV; MetS, metabolic syndrome; MSM, men who have sex with men; TG, triglycerides; HDL-C, high-density lipoprotein cholesterol; ART, antiretroviral therapy; NNRTIs, non-nucleoside reverse transcriptase inhibitors; NRTIs, nucleoside reverse transcriptase inhibitors; PIs, protease inhibitors; INSTIs, integrase strand transfer inhibitors; TDF, tenofovir disoproxil fumarate; LLV, Low-level viremia.

**Notes**: Viral suppression (baseline viral loads <50 copies/mL or undetectable), low viral load (detectable but baseline viral loads <3 log₁₀ copies/mL), and high viral load (baseline viral loads >3 log₁₀ copies/mL). No LLV (all viral loads <50 copies/mL or undetectable after 6 months of ART); LLV 51-200 (two consecutive viral loads between 51-200 copies/mL); LLV 201-500 (two consecutive viral loads between 201-500 copies/mL).

**Table S2. Sensitivity analysis of LLV as an independent risk factor for MetS by TDF use**

|  | Sensitivity analysis A | Sensitivity analysis B |
| --- | --- | --- |
| No LLV | Ref. | Ref. |
| LLV 51-200 | 1.086(1.017-1.159) * | 0.978(0.894-1.070) |
| LLV 201-500 | 1.104(0.994-1.226) | 1.132(1.014-1.263) * |

**Notes**: Sensitivity analysis A: non-TDF-based (n=574). Sensitivity analysis B: TDF-based (n=274). No LLV (all viral loads <50 copies/mL or undetectable after 6 months of ART); LLV 51-200 (two consecutive viral loads between 51-200 copies/mL); LLV 201-500 (two consecutive viral loads between 201-500 copies/mL). *: p < 0.05.


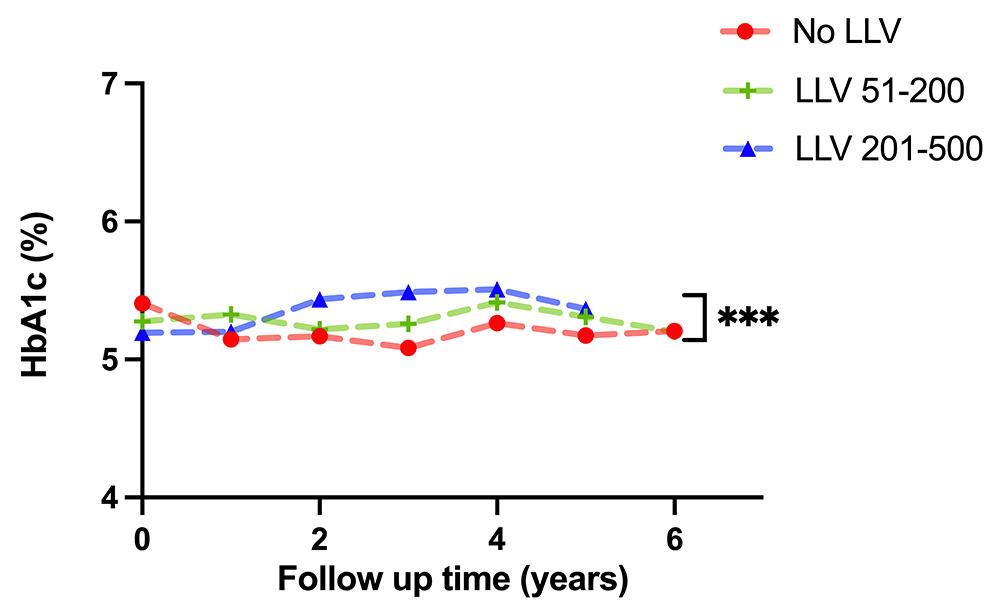


**Figure S1.** Longitudinal comparison of HbA1c levels across viremia categories over seven time points. No LLV (all viral loads <50 copies/mL or undetectable after 6 months of ART); LLV 51-200 (two consecutive viral loads between 51-200 copies/mL); LLV 201-500 (two consecutive viral loads between 201-500 copies/mL). ***: p < 0.001.
